# Supplementary material for: Luminescent latex particles loaded with anionic lanthanide complexes: a versatile platform for multicolour optical coding
Source: Royal Society of Chemistry journal article supplement (doi:10.1039/c3tc00756a), 2013-01-01
Supplement: c3tc00756a.pdf [file c3tc00756a.pdf]

Cite this: DOI: 10.1039/c0xx00000x

www.rsc.org/xxxxxx

ARTICLE TYPE

## Luminescent latex particles loaded with anionic lanthanide complexes: versatile platforms for multicolour optical coding

N. Wartenberg<sup>a,b</sup>, O. Raccurt<sup>b,c</sup>, D. Imbert<sup>d</sup>, M. Mazzanti<sup>d</sup>, E. Bourgeat-Lami<sup>a,\*</sup>

Received (in XXX, XXX) XthXXXXXXXXXX 20XX, Accepted Xth XXXXXXXXXXXX 20XX

DOI: 10.1039/b000000x

**ABSTRACT:** Luminescent polymer latexes based on lanthanide complexes have been synthesized by miniemulsion polymerization. A self-assembled europium complex was embedded into poly(methyl methacrylate) nanoparticles without covalent linking and compared to a commercially-available neutral chelate. The nature of the surfactant was found to have a great impact on the incorporation process for the europium complex and only the latexes stabilized by a cationic surfactant exhibited a luminescence signal. A maximum doping level of about 2% in weight in the final monodispersed particles was obtained. The resulting polymeric luminescent nanoparticles showed good stability over leakage. The described synthetic method was used to incorporate multiple lanthanide complexes into latexes nanoparticles affording multicolour nanolabels. Two series of polymeric latexes bearing codes are presented.

### SUPPORTING INFORMATION

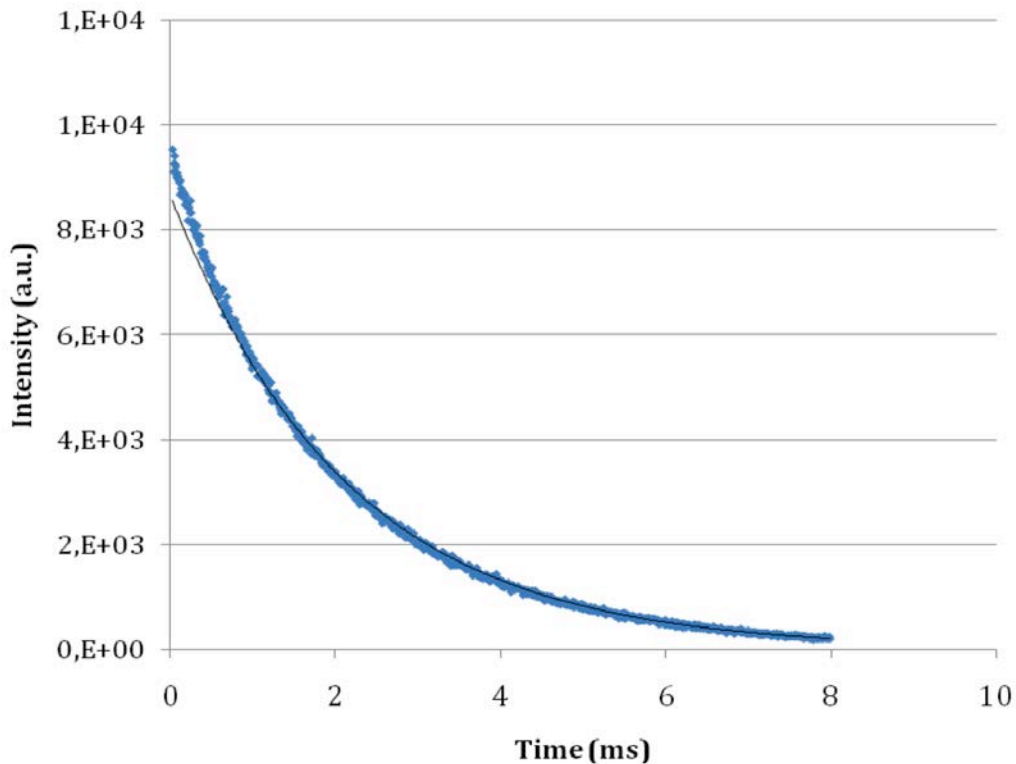

Figure S1. Experimental lifetime of  $\text{Eu}(\text{pytz})_3(\text{NHOct}_3)_3$ -loaded PMMA latex particles at 617 nm.  $\lambda$  (excitation) = 300 nm (blue curve) and fitting curve (black).

C

V

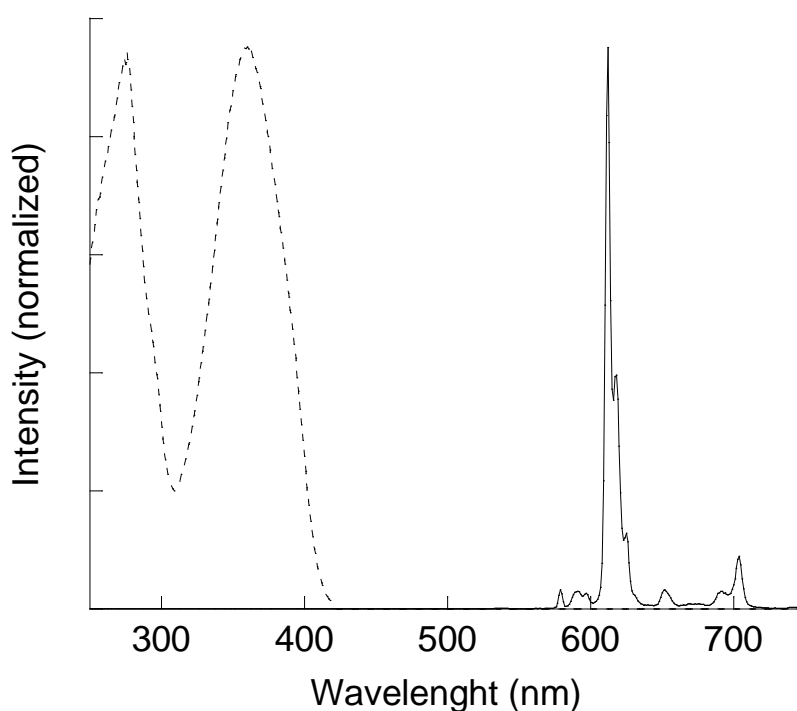

Figure S2. Excitation (dashed line) and emission (full lines) spectra of  $\text{Eu}(\text{dbm})_3(\text{phen})$ -loaded PMMA latex particles stabilized by SDS ( $\lambda_{\text{ex}} = 612 \text{ nm}$  and  $\lambda_{\text{em}} = 360 \text{ nm}$ ). Similar excitation and emission spectra were recorded for the latexes stabilized by CTAB.

### Determination of the incorporation efficiency

The incorporation efficiency was calculated as follows:

$$\text{Incorporation efficiency (\%)} = \frac{n_{\text{initial}} - n_{\text{serum}}}{n_{\text{initial}}} \times 100$$

where:

Cite this: DOI: 10.1039/c0xx00000x

www.rsc.org/xxxxxx

ARTICLE TYPE

$n_{initial}$  is the quantity of lanthanide complexes initially introduced (mol) and,

$n_{serum}$  is the quantity of lanthanide complexes in the water phase (not incorporated) determined by ICPMS after filtration (mol).

### Determination of the number of lanthanide complexes per particle

The number of latex particles is given by the following equation:

$$N_p = \frac{\left( \frac{m_m \times C}{d_m} + \frac{m_m(1-C)}{d_p} \right) \times 6 \times 10^{21}}{\Pi \times D_p^3}$$

where

$m_m$  is the amount of monomer introduced (g)

$d_m$  is the monomer density ( $\text{g}\cdot\text{cm}^{-3}$ )

$d_p$  is the polymer density ( $\text{g}\cdot\text{cm}^{-3}$ )

$D_p$  is the DLS particle diameter (nm)

$C$  is the monomer to polymer conversion

The number of lanthanide complexes per particle was then calculated according to:

$$\text{Lanthanide complexes per particle} = \frac{n_{L_n} \times N_A}{N_p}$$

where  $N_p$  is the particle number,  $N_A$  is the Avogadro number ( $\text{mol}^{-1}$ ) and  $n_{L_n}$  is the quantity of incorporated lanthanide complexes (mol) determined by ICPMS.

Cite this: DOI: 10.1039/c0xx00000x

www.rsc.org/xxxxxx

## ARTICLE TYPE

The luminescence emission spectra of the  $\text{Lnpytz}_3(\text{NHOct}_3)_3$  complexes reported in Figures S3-S6 were recorded using different slit parameters in order to obtain higher quality spectra for all complexes independently of their luminescence quantum yields.

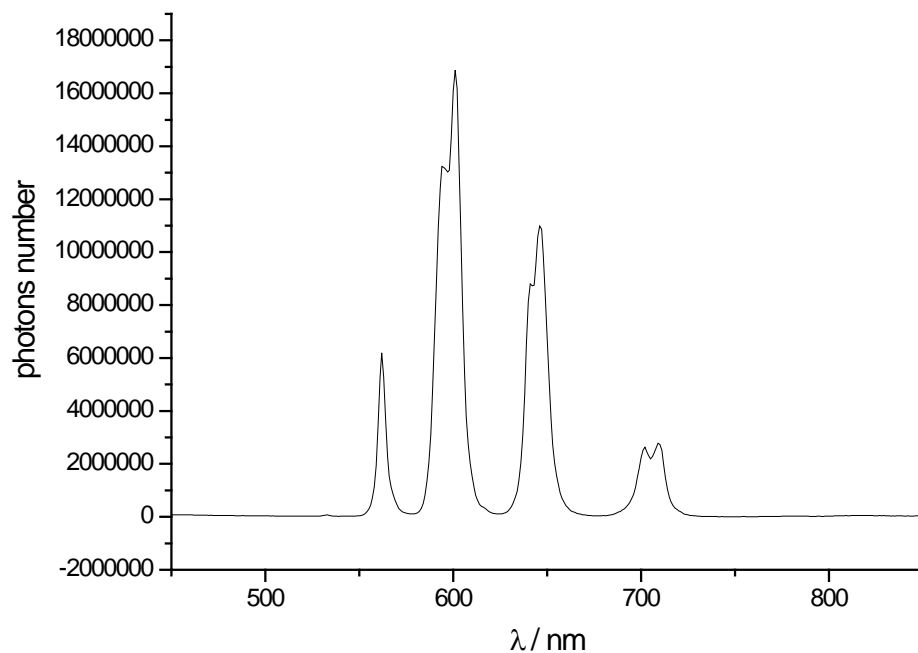

Figure S3. Emission spectrum of  $\text{Sm}(\text{pytz})_3(\text{NHOct}_3)_3$  in methanol at  $2.3 \cdot 10^{-3} \text{ M}$ .

Cite this: DOI: 10.1039/c0xx00000x

www.rsc.org/xxxxxx

ARTICLE TYPE

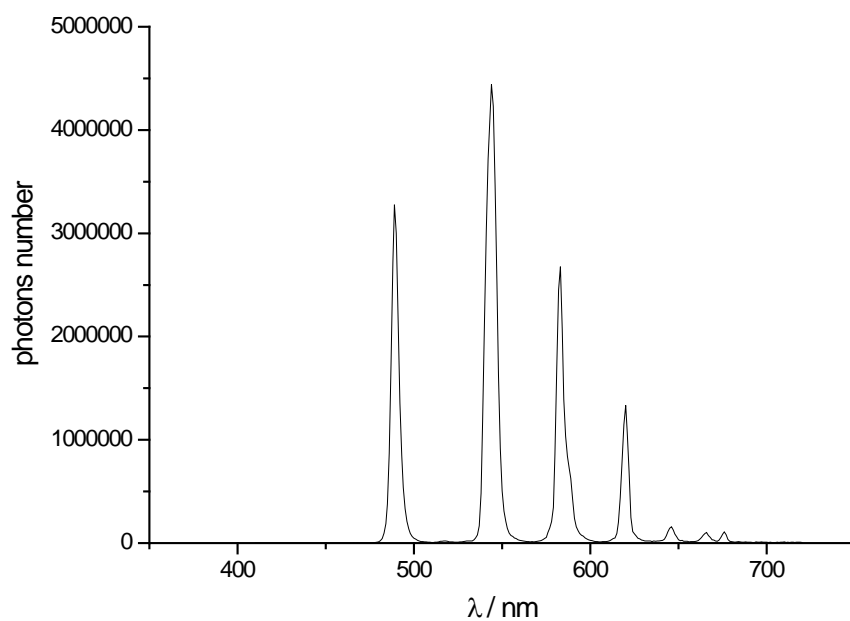

Figure S4. Emission spectrum of  $\text{Tb}(\text{pytz})_3(\text{NHOct}_3)_3$  in methanol at  $2.3 \cdot 10^{-3}$  M.

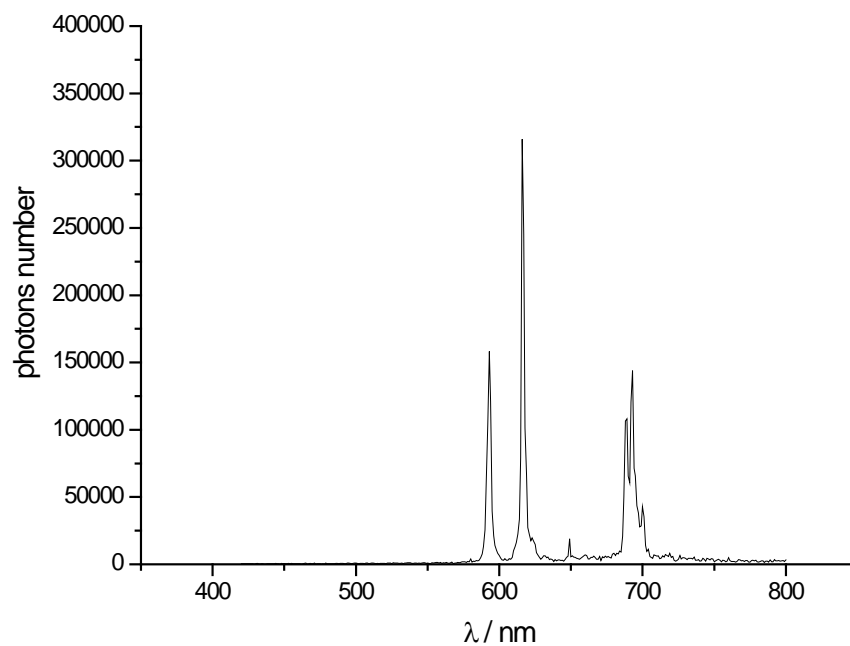

Figure S5. Emission spectrum of  $\text{Eu}(\text{pytz})_3(\text{NHOct}_3)_3$  in methanol at  $2.3 \cdot 10^{-3}$  M.

Cite this: DOI: 10.1039/c0xx00000x

www.rsc.org/xxxxxx

ARTICLE TYPE

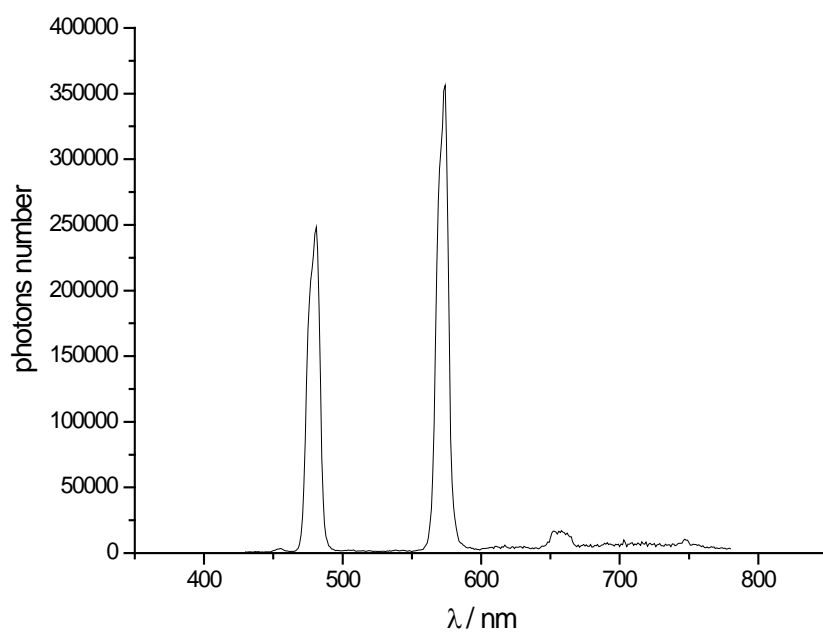

Figure S6. Emission spectrum of Dy(pytz)<sub>3</sub>(NHOct<sub>3</sub>)<sub>3</sub> in methanol at 2.3 · 10<sup>-3</sup> M.
